# Supplementary material for: Enhanced efficiency of planar-heterojunction perovskite solar cells through a thermal gradient annealing process
Source: Royal Society of Chemistry journal article supplement (doi:10.1039/c5ra09691j), 2015-01-01
Supplement: c5ra09691j1.pdf [file c5ra09691j1.pdf]

**Supporting Information**

**Enhanced Efficiency of Planar-Heterojunction Perovskite Solar Cells  
through a Thermal Gradient Annealing Process**

Bingbing Fan,<sup>†,‡</sup> Dehua Peng,<sup>§</sup> Shiwei Lin,<sup>§</sup> Nü Wang,<sup>†</sup> Yong Zhao,<sup>\*,†</sup> and Yanming Sun<sup>\*,†,‡</sup>

<sup>†</sup>Key Laboratory of Bio-Inspired Smart Interfacial Science and Technology of Ministry of Education, Beijing Key Laboratory of Bio-inspired Energy Materials and Devices, School of Chemistry and Environment, Beihang University, Beijing 100191, PR China.

<sup>‡</sup>Heeger Beijing Research and Development Center, International Research Institute for Multidisciplinary Science, Beihang University, Beijing 100191, P. R. China

<sup>§</sup>Key Laboratory of Ministry of Education for Advanced Materials in Tropical Island Resources, College of Materials and Chemical Engineering, Hainan University, Haikou 570228, P. R. China

Corresponding Author

\*E-mail: zhaoyong@buaa.edu.cn; sunym@buaa.edu.cn

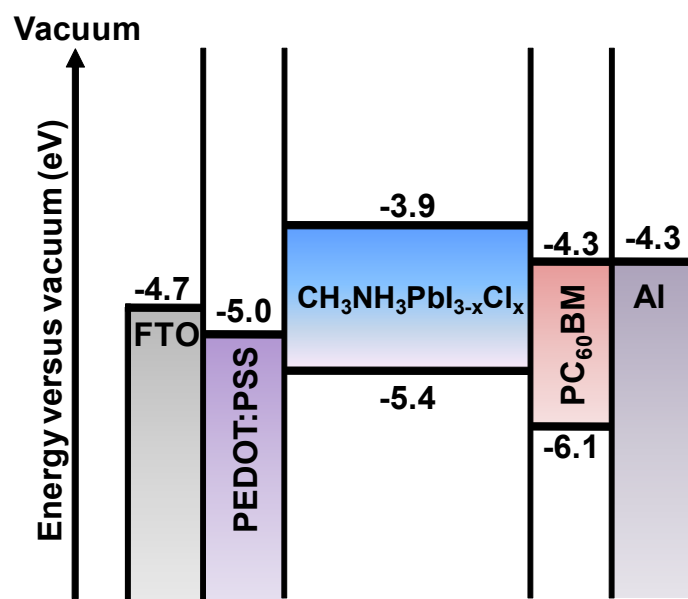

**Figure S1.** Schematic energy level diagram of the components in the perovskite solar cells.<sup>1-</sup>

2

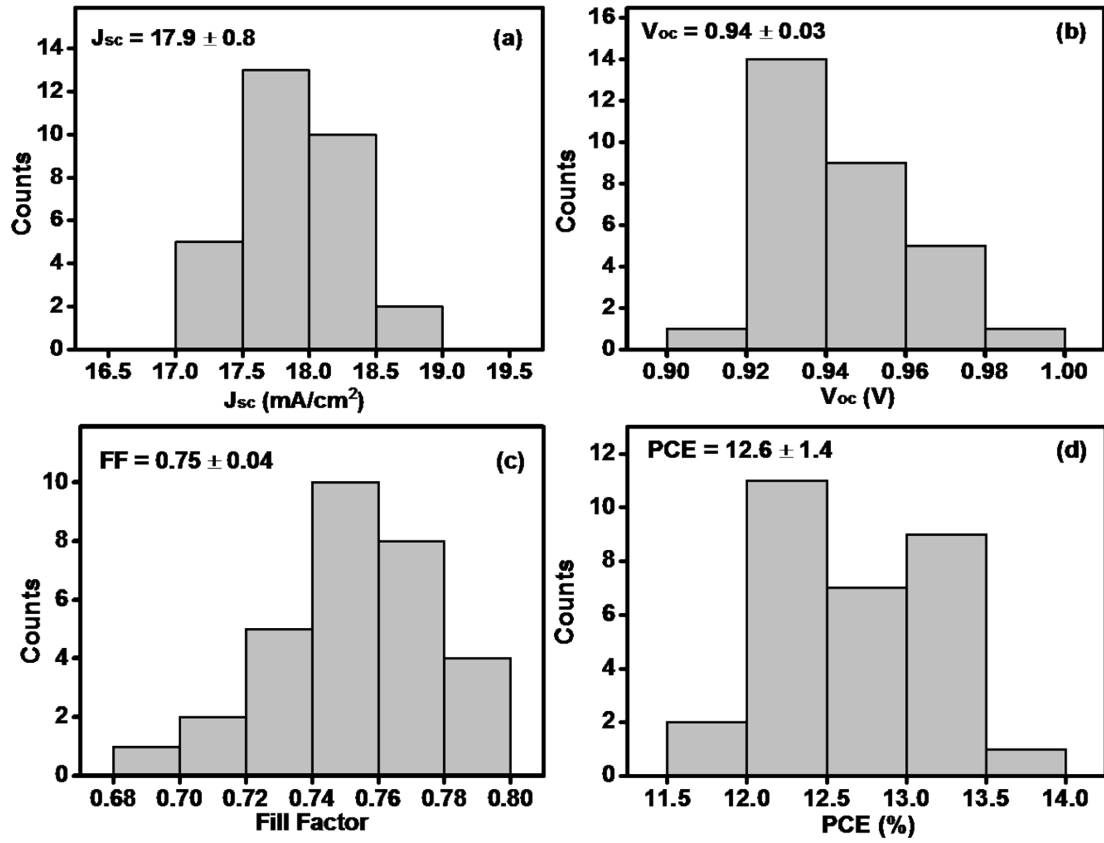

**Figure S2.** Device parameter ( $J_{sc}$ ,  $V_{oc}$ , FF and PCE) distribution of perovskite solar cells with the gradient annealing process. 30 cells were tested and the average PCE is 12.6%.

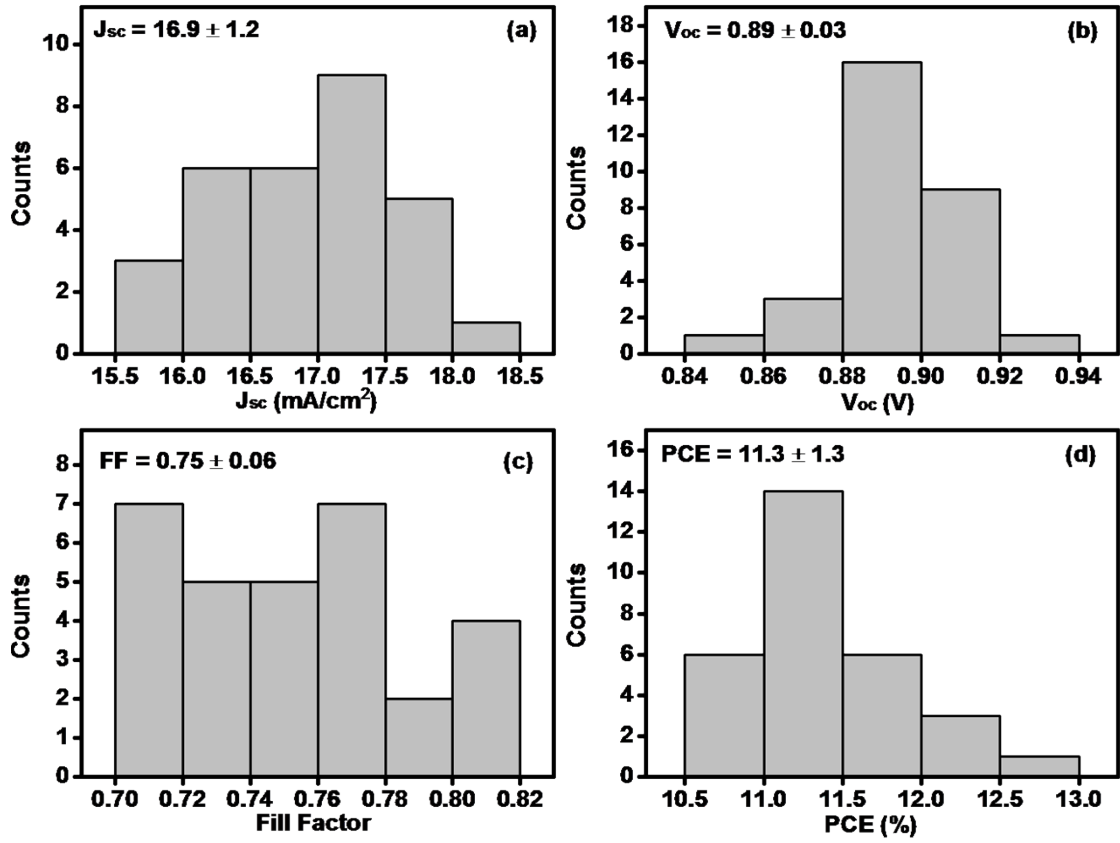

**Figure S3.** Device parameter ( $J_{sc}$ ,  $V_{oc}$ , FF and PCE) distribution of perovskite solar cells with the direct annealing process. 30 cells were tested and the average PCE is 11.3%.

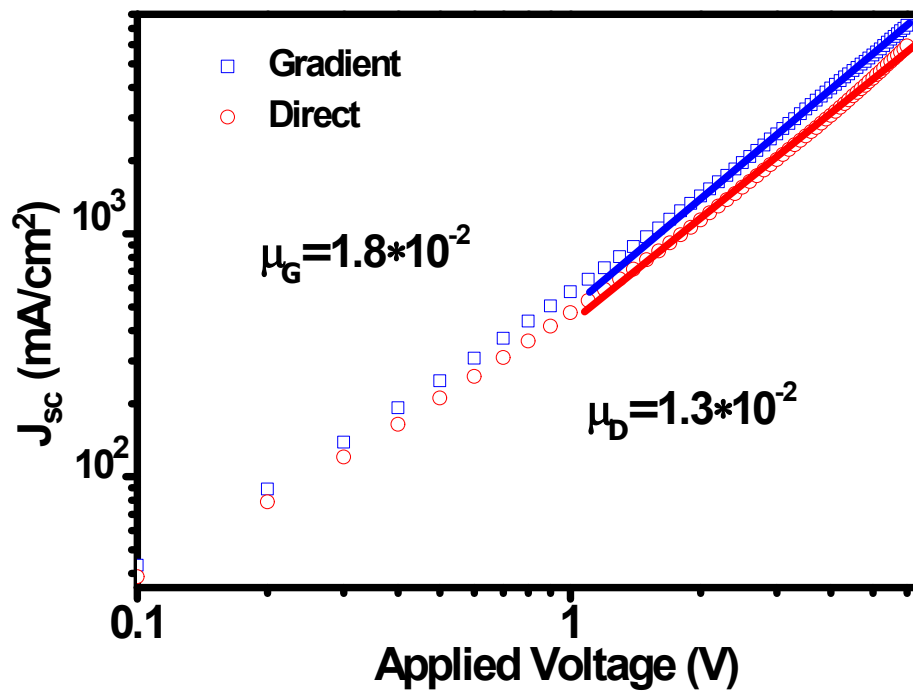

Figure S4. Current-voltage (I-V) characteristics and space-charge-limited current (SCLC) fittings of the hole-only diode with GA and DA processes (FTO/PEDOT:PSS/CH<sub>3</sub>NH<sub>3</sub>PbI<sub>3-x</sub>Cl<sub>x</sub>/MoO<sub>x</sub>/Al).

**Table S1.** Device parameters of perovskite solar cells measured in the reverse and forward scanning directions.

| Annealing process  | Device Number | $J_{sc}$ (mA/cm <sup>2</sup> ) | $V_{oc}$ (V)    | FF (%)          | PCE (%)         |
|--------------------|---------------|--------------------------------|-----------------|-----------------|-----------------|
|                    |               | reverse/forward                | reverse/forward | reverse/forward | reverse/forward |
| Gradient Annealing | G1            | 18.6/18.6                      | 0.96/0.96       | 78.3/78.0       | 14.0/13.9       |
|                    | G2            | 17.7/17.9                      | 0.94/0.95       | 74.9/72.3       | 12.5/12.3       |
|                    | G3            | 17.7/18.0                      | 0.98/0.98       | 73.7/71.2       | 12.8/12.5       |
|                    | G4            | 17.8/17.7                      | 0.94/0.93       | 75.8/72.7       | 12.7/12.0       |
|                    | G5            | 18.1/18.0                      | 0.96/0.97       | 74.5/74.6       | 13.0/13.0       |
| Direct Annealing   | D1            | 17.9/17.7                      | 0.92/0.91       | 76.6/72.3       | 12.6/11.6       |
|                    | D2            | 17.8/17.8                      | 0.88/0.88       | 74.5/71.7       | 11.7/11.2       |
|                    | D3            | 16.0/15.7                      | 0.90/0.89       | 80.5/69.3       | 11.6/9.70       |
|                    | D4            | 17.2/16.9                      | 0.88/0.87       | 73.1/68.1       | 11.1/10.0       |
|                    | D5            | 17.6/17.0                      | 0.88/0.88       | 76.4/74.1       | 11.8/11.1       |

1. Y. Liu, Z., Q. Chen, W. Chang, H. Zhou, T.-B. Song, E. Young, Y. Yang, J. You, G. Li, and Y. Yang, *Nano Lett.*, 2015, **15**, 662-668
2. Y. Sun, G. C. Welch, W. L. Leong, C. J. Takacs, G. C. Bazan, and Alan J. Heeger, *Nature Mater.*, 2012, **11**, 44-48.
